# Supplementary material for: Novel imprinted soluble microgels with hydrolytic catalytic activityElectronic supplementary information (ESI) available: Fig. S1 and S2: raw and corrected kinetic data of Pol396 and Pol397 with substrate. General methodology for polymer preparation and kinetic assays. See http://www.rsc.org/suppdata/cc/b3/b312631e/
Source: Royal Society of Chemistry journal article supplement (doi:10.1039/b312631e), 2004-01-01
Supplement: b312631e.doc [file b312631e.doc]

**Supplementary Information**

**Fig. S1 and fig. S2 show the raw and corrected kinetic data of Pol396 and Pol397 with substrate 3.**

**General methodology for polymer preparation and kinetic assays**

In a typical preparation the arginine (2eq.) and the tyrosine (1eq) monomers are dissolved in the appropriate volume of DMSO followed by addition of the template (1eq.). After a few minutes acrylamide, N,N’-ethylene bisacrylamide and the initiator azoisobutyronitrile (1.5%) are added. The reaction mixture is flushed with nitrogen and sealed in WhetmanTM bottles and is heated at 80ºC for 4 days. Subsequently the polymer is precipitated by the addition of diethylether, filtered and resuspended in a solution of 5% triethylamine in methanol (v/v) to extract the template. The solution is gently stirred overnight. Polymer is isolated by extensive dialysis against water followed by freezedrying that gives the polymer as a fine white poweder. Non imprinted polymers follow the same procedure.

Hydrolysis of carbonate **2** was performed in a 9:1 solution of DMSO and Tris-HCl buffer (0.05M, pH 8.0) at 25°C. The catalytic activity of the microgels was investigated by monitoring the release of 4-nitrophenolate, at =425nm (=9473 M-1s-1) or 2-nitrophenolate at = 441(=1957 M-1s-1).
